# Supplementary material for: Increase in emergency admissions to hospital for children aged under 15 in England, 1999-2010: national database analysis
Source: HighWire-hosted journal article supplement (doi:10.1136/archdischild-2012-302383), 2013-02-11
Supplement: archdischild-2012-302383supp_table1.pdf [file archdischild-2012-302383supp_table1.pdf]

**Supplementary Table 1 (Web only): ICD-10 Codes used to define primary care sensitive conditions**

| <b>Primary care sensitive condition</b> | <b>ICD-10 codes</b>                                                                 |
|-----------------------------------------|-------------------------------------------------------------------------------------|
| <b><i>Acute infections</i></b>          |                                                                                     |
| Lower respiratory tract infections      | J10.0, J11.0, J11.1, J12-J16, J18.0, J18.1, J18.9, J21                              |
| Upper respiratory tract infections      | H66, H67, J02, J03, J04.0, J06, J31.2                                               |
| Dehydration and gastroenteritis         | E86, K52.2, K52.8, K52.9, A02.0, A04, A07.2, A08.0, A08.1, A08.3, A08.4, A08.5, A09 |
| Urinary tract infections                | N10-N12, N13.6, N15.9, N30.0, N30.8, N30.9, N39.0                                   |
| <b><i>Chronic conditions</i></b>        |                                                                                     |
| Asthma                                  | J45, J46                                                                            |
| Epilepsy                                | G40, G41                                                                            |
| Diabetes                                | E10-E14                                                                             |
| <b><i>Other</i></b>                     |                                                                                     |
| Vaccine-preventable diseases            | A35-A37, A80, B05, B06, B16.1, B16.9, B18.0, B18.1, B26, G00.0, M01.4               |
